# Supplementary material for: Exosomal MicroRNA as Biomarkers for Diagnosing or Monitoring the Progression of Ovarian Clear Cell Carcinoma: A Pilot Study
Source: MDPI journal article supplement (doi:10.3390/molecules27123953), 2022-06-20
Supplement: s1 [file s1]

**Table S1 : The details of exosomal miRNAs by combination of histological types.**

| HAC2             | HRA             | HAC2 HRA        | MCAS            | HAC2 MCAS |
|------------------|-----------------|-----------------|-----------------|-----------|
| hsa-miR-6508-5p  | hsa-miR-6789-5p | hsa-miR-3162-3p | hsa-miR-3162-5p |           |
| hsa-miR-1304-3p  | hsa-miR-8063    | hsa-miR-1268a   | hsa-miR-4793-5p |           |
| hsa-miR-6766-3p  | hsa-miR-602     | hsa-miR-4767    | hsa-miR-135a-3p |           |
| hsa-miR-24-3p    | hsa-miR-1224-5p | hsa-miR-6872-3p | hsa-miR-4746-3p |           |
| hsa-miR-4665-3p  | hsa-miR-4532    | hsa-miR-8485    | hsa-miR-6893-5p |           |
| hsa-miR-4436b-5p | hsa-miR-4516    | hsa-miR-320b    | hsa-miR-6734-5p |           |
| hsa-miR-23a-3p   | hsa-miR-4689    |                 |                 |           |
| hsa-miR-191-3p   |                 |                 |                 |           |
| hsa-miR-4787-3p  |                 |                 |                 |           |
| hsa-miR-27a-3p   |                 |                 |                 |           |
| hsa-miR-22-3p    |                 |                 |                 |           |
| hsa-miR-4728-3p  |                 |                 |                 |           |
| hsa-miR-4433a-5p |                 |                 |                 |           |
| hsa-miR-92a-3p   |                 |                 |                 |           |
| hsa-miR-6763-3p  |                 |                 |                 |           |
| hsa-miR-6797-3p  |                 |                 |                 |           |
| hsa-miR-7111-3p  |                 |                 |                 |           |

| HRA MCAS        | HAC2<br>HRA<br>MCAS | OVAS                         | HAC2 OVAS                                         | HRA OVAS        | HAC2 HRA OVAS                                                                                                                           |
|-----------------|---------------------|------------------------------|---------------------------------------------------|-----------------|-----------------------------------------------------------------------------------------------------------------------------------------|
| hsa-miR-6723-5p |                     | hsa-miR-3198<br>hsa-miR-3196 | hsa-miR-30d-5p<br>hsa-miR-29a-3p<br>hsa-miR-21-5p | hsa-miR-6803-5p | hsa-miR-6127<br>hsa-miR-19a-3p<br>hsa-miR-1260a<br>hsa-miR-20a-5p<br>hsa-miR-4507<br>hsa-miR-574-5p<br>hsa-miR-30e-5p<br>hsa-miR-29b-3p |

| MCAS OVAS       | HAC2 MCAS<br>OVAS | HRA MCAS<br>OVAS | HAC2 HRA MCAS<br>OVAS | TOV112D         |
|-----------------|-------------------|------------------|-----------------------|-----------------|
| hsa-miR-4478    | hsa-miR-4721      | hsa-miR-3652     | hsa-miR-1249-5p       | hsa-miR-5787    |
| hsa-miR-6785-5p | hsa-miR-4485-3p   | hsa-miR-4465     | hsa-miR-1260b         | hsa-miR-5703    |
|                 | hsa-miR-1234-3p   | hsa-miR-937-5p   | hsa-miR-6826-5p       | hsa-miR-3648    |
|                 |                   | hsa-miR-4443     | hsa-miR-5100          | hsa-miR-3610    |
|                 |                   | hsa-miR-4257     | hsa-miR-7977          | hsa-miR-4499    |
|                 |                   |                  | hsa-miR-7975          | hsa-miR-4476    |
|                 |                   |                  | hsa-miR-7641          | hsa-miR-4417    |
|                 |                   |                  | hsa-miR-17-5p         | hsa-miR-630     |
|                 |                   |                  | hsa-miR-16-5p         | hsa-miR-6807-5p |
|                 |                   |                  | hsa-miR-4286          | hsa-miR-3940-5p |
|                 |                   |                  | hsa-miR-4485-5p       | hsa-miR-345-5p  |
|                 |                   |                  | hsa-miR-6875-5p       | hsa-miR-3141    |
|                 |                   |                  |                       | hsa-miR-6089    |
|                 |                   |                  |                       | hsa-miR-4270    |
|                 |                   |                  |                       | hsa-miR-1908-3p |
|                 |                   |                  |                       | hsa-miR-4763-3p |
|                 |                   |                  |                       | hsa-miR-6768-5p |
|                 |                   |                  |                       | hsa-miR-4745-5p |
|                 |                   |                  |                       | hsa-miR-188-5p  |
|                 |                   |                  |                       | hsa-miR-2861    |
|                 |                   |                  |                       | hsa-miR-320a    |

| HAC2 TOV112D    | HRA TOV112D     | HAC2 HRA<br>TOV112D | MCAS<br>TOV112D | HAC2 MCAS<br>TOV112D | HRA MCAS<br>TOV112D |
|-----------------|-----------------|---------------------|-----------------|----------------------|---------------------|
| hsa-miR-7152-3p | hsa-miR-6724-5p |                     | hsa-miR-575     |                      | hsa-miR-5739        |
| hsa-miR-378a-3p |                 |                     | hsa-miR-3646    |                      | hsa-miR-629-3p      |
|                 |                 |                     | hsa-miR-4530    |                      | hsa-miR-6765-3p     |

| HAC2 HRA<br>MCAS<br>TOV112D | OVAS TOV112D    | HAC2 OVAS<br>TOV112D | HRA OVAS<br>TOV112D | HAC2 HRA OVAS<br>TOV112D | MCAS OVAS<br>TOV112D |
|-----------------------------|-----------------|----------------------|---------------------|--------------------------|----------------------|
|                             | hsa-miR-4739    | hsa-miR-1281         |                     | hsa-miR-197-3p           | hsa-miR-4787-5p      |
|                             | hsa-miR-6858-5p |                      |                     | hsa-miR-19b-3p           | hsa-miR-4515         |
|                             | hsa-miR-1305    |                      |                     |                          | hsa-miR-4634         |
|                             | hsa-miR-6869-5p |                      |                     |                          |                      |
|                             | hsa-miR-874-3p  |                      |                     |                          |                      |

| <b>HAC2 MCAS<br/>OVAS<br/>TOV112D</b> | <b>HRA MCAS<br/>OVAS<br/>TOV112D</b> | <b>HAC2 HRA MCAS<br/>OVAS TOV112D</b>                                                                                                                                                                                                                                                                                                                                                                                                                                                                         |
|---------------------------------------|--------------------------------------|---------------------------------------------------------------------------------------------------------------------------------------------------------------------------------------------------------------------------------------------------------------------------------------------------------------------------------------------------------------------------------------------------------------------------------------------------------------------------------------------------------------|
| hsa-miR-940                           |                                      | hsa-miR-6767-5p<br>hsa-miR-4313<br>hsa-miR-25-3p<br>hsa-miR-425-3p<br>hsa-miR-6880-3p<br>hsa-miR-4749-3p<br>hsa-miR-5581-5p<br>hsa-miR-494-3p<br>hsa-miR-766-3p<br>hsa-miR-4725-5p<br>hsa-miR-1237-3p<br>hsa-miR-93-5p<br>hsa-miR-378i<br>hsa-miR-4713-3p<br>hsa-miR-4653-3p<br>hsa-miR-106b-5p<br>hsa-miR-4299<br>hsa-miR-4291<br>hsa-miR-4284<br>hsa-miR-6798-5p<br>hsa-miR-4728-5p<br>hsa-miR-574-3p<br>hsa-miR-4716-3p<br>hsa-miR-371a-5p<br>hsa-miR-4672<br>hsa-miR-4656<br>hsa-miR-320d<br>hsa-miR-1181 |
